# Supplementary material for: Enhanced capacity and cycle life of nitrogen-doped activated charcoal anode for the lithium ion battery: a solvent-free approach
Source: Royal Society of Chemistry journal article supplement (doi:10.1039/c6ra27836a), 2017-01-01
Supplement: c6ra27836a1.pdf [file c6ra27836a1.pdf]

## Supporting Information

### Enhanced Capacity and Cycle Life of Nitrogen-doped Charcoal Anode for the Lithium Ion Battery: A Solvent-free Approach

Chandrasekar M Subramaniyam<sup>a,b</sup>, N. R. Srinivasan<sup>c</sup>, Zhixin Tai<sup>a</sup>, Hua Kun Liu<sup>a,\*</sup>, Shi Xue Dou<sup>a</sup>

<sup>a</sup> Institute for Superconducting and Electronic Materials, Australian Institute for Innovative Materials, University of Wollongong, Innovation Campus, North Wollongong, NSW 2500 Australia

<sup>b</sup> Texas Materials Institute, Department of Mechanical Engineering, University of Texas Austin, 204 E Dean Keeton St., C2200, Austin, Texas 78712 USA

<sup>c</sup> Department of Chemical Engineering, Indian Institute of Technology Madras, Chennai 600036 India

\*Corresponding author Email: hua@uow.edu.au (Prof. Hua Kun Liu)

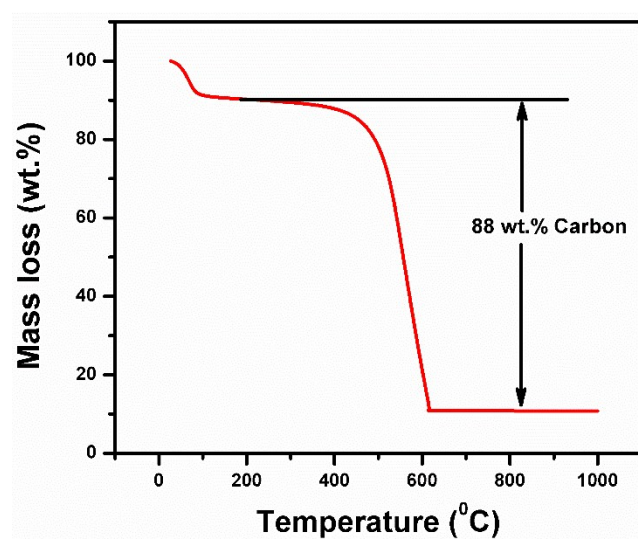

Fig. S1 Thermogravimetric analysis of activated charcoal (R-AC)



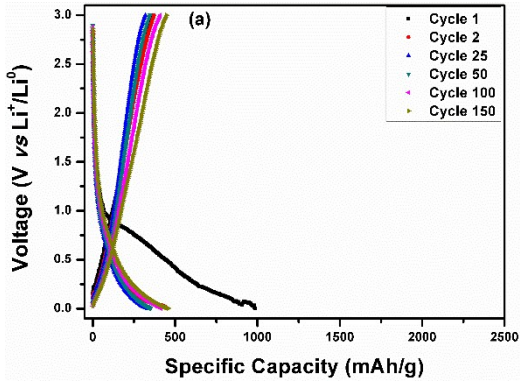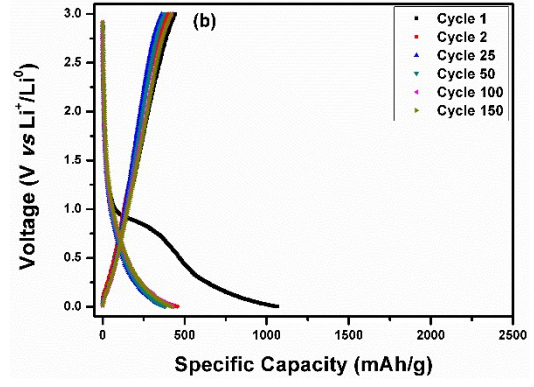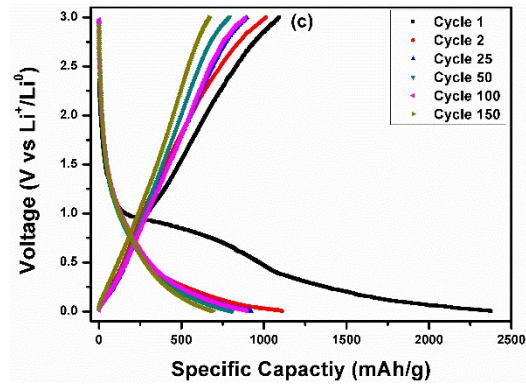

Fig. S2 Charge-discharge plots at different cycle number of (a) R-AC, (b) N-AC, and (c) NH-AC obtained at  $50 \text{ mA g}^{-1}$ .

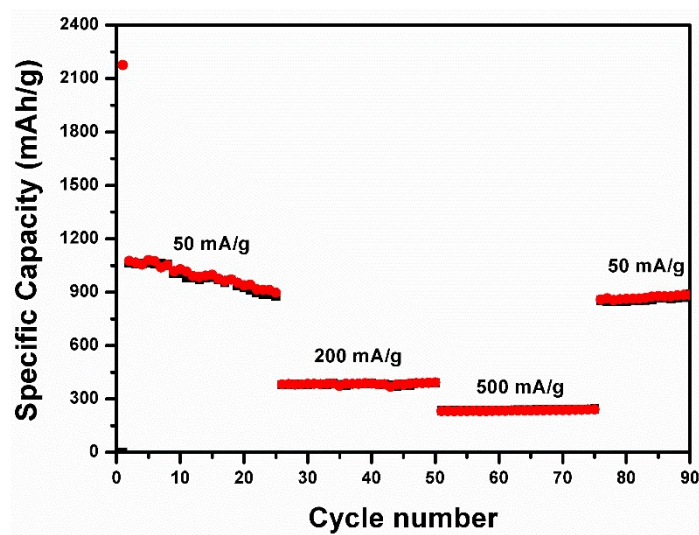

Fig. S3 Rate plot of NH-AC obtained at different current densities.
